# Supplementary material
Source: PubMed Central journal article supplement (PMC5503748)
Supplement: NIHMS857411-supplement-401_2017_1691_MOESM1_ESM.pdf [file NIHMS857411-supplement-401_2017_1691_MOESM1_ESM.pdf]

sp|Q6S8J3|POTEE\_HUMAN  
sp|Q9BYX7|ACTBM\_HUMAN  
sp|Q6S8J3|POTEE\_HUMAN  
sp|Q9BYX7|ACTBM\_HUMAN

MVVEVDSMPAASSVKKPFGLRSKMGKWCCRCFCYRESGKSNVGTSGDHDDSAMKTLRSK  
-----  
MGKWCHHCFPCRGSNGASGDHDDSAMKTLRNKMGKWCCFCPCRGSNGKSKVGAW  
-----  
GDYDDSAFMEPRYHVRGEDLDKLRHAAWGWKVPKDLIVMLRDTDVNKKDKQKRTALHLA  
-----  
SANGNSEVVKLLDDRRCQLNVLNKKRTALIKAVQCQEDECALMLLEHGTDPNIPDEYGN  
-----  
TTLHYAIYNEDKLMKALLLYGADIESKNKHGLTPLLGLVHEQKQVVKFLIKKANLNA  
-----  
LDRYGRITALILAVCCGSASIVSLLLEQNIDVSSQDLGQTAREYAVSSHHHVICQLLSDY  
-----  
KEKQMLKISSENSNPEQELKLTSEESQRFKGSSENSQPEKMSQELEINKDGDREVEEMK  
-----  
KHESNNVGLLENLTNGVGTAGNGDGLIPQRKSRTPENQQFPDNESEEYHRICELLSDYKE  
-----  
KQMPKYSSSENSNPEQDLKLTSEESQRLKGSSENGQPEKRSQEPPEINKDGDRELENFMAIE  
-----  
EMKKHGSTHVGFPEPENTNGATAGNGDDGLIPPRKSRTPEQQFPDTENEYHSDEQNDTQ  
-----  
KQFCQEQTGILHDEILIHHEEKQIEVVEKMNSELSLCKKEKVDLHENSTLREEIAMRL  
-----  
ELDTMKHQSQLREKKYLEDIESVKKKNDNLLKALQLNELTMDDDTAVLVIDNGSGMCKAG  
-----MDDDTAVLVIDNGSGMCKAG

sp|Q6S8J3|POTEE\_HUMAN  
sp|Q9BYX7|ACTBM\_HUMAN

FAGDDAPRAVFPSIVGRPRQGGMMGMHQKESYVGKEAQSQRGILTLKYPMEHGIITNWD  
FAGDDAPQAVFPSIVGRPRHQGMMEGMHQKESYVGKEAQSQRGMLTLKYPMEHGIITNWD  
\*\*\*\*\*:\*\*\*\*\*:\*\*\*\* \*\*\*\*\*:\*\*\*\*\*

sp|Q6S8J3|POTEE\_HUMAN  
sp|Q9BYX7|ACTBM\_HUMAN

DMEKIWHHTFYNELRVAPEEHPILLTEAPLNPKANREKMTQIMFETFNTPAMYVAIQAVP  
DMEKIWHHTFYNELRVAPEEHPILLTEAPLNPKANREKMTQIMFETFNTPAMYVAIQAVL  
\*\*\*\*\*

sp|Q6S8J3|POTEE\_HUMAN  
sp|Q9BYX7|ACTBM\_HUMAN

SLYTSGRTTGIVMDSGDGVTHTVPIYEGNALPHATLRLDLAGRELPDYLMKILTERGYRF  
SLYTSGRTTGIVMDSGDGVTHTVPIYEGNALPHATLRLDLAGRELTDYLMKILTERGYRF  
\*\*\*\*\*

sp|Q6S8J3|POTEE\_HUMAN  
sp|Q9BYX7|ACTBM\_HUMAN

TTMAEREIVRDIKEKLCYVALDFEQEMATAASSSSLEKSYELPDGQVITIGNERFRCP  
TTTAEQEIIVRDIKEKLCYVALDSEQEMAMAASSSSVEKSYELPDGQVITIGNERFRCP  
\*\* \*:\*\*\*\*\*:\*\*\*\*\* \*\*\*\*\*:\*\*\*\*\*

sp|Q6S8J3|POTEE\_HUMAN  
sp|Q9BYX7|ACTBM\_HUMAN

LFQPCFLGMESCGIHEHTTFNSIMKSDVDIRKDLTYTNTVLSGGTTMYPGMAHRMQKEIAAL  
LFQPCFLGMESCGIHKTTFNSIVKSDVDIRKDLTYTNTVLSGGTTMYPGIAHRMQKEITAL  
\*\*\*\*\*:\*\*\*\*\*:\*\*\*\*\*:\*\*\*\*\*:\*\*\*\*\*:\*\*\*\*\*

sp|Q6S8J3|POTEE\_HUMAN  
sp|Q9BYX7|ACTBM\_HUMAN

APSMKIRIIAPPKRKYSVWVGSILASLSTFQQMWISKQEYDESGPSIVHRKCF  
APSIMKIKIIAPPKRKYSVWVGSILASLSTFQQMWISKQEYDESGPSIVHRKCF  
\*\* \*:\*\*\*\*\*:\*\*\*\*\*

| Identified Peptide      | Present in ACTBM? | Present in other Actin Isoforms? | Average LFQ Intensity (rpAD) | Average LFQ Intensity (sAD) |
|-------------------------|-------------------|----------------------------------|------------------------------|-----------------------------|
| AGFAGDDAPR              | No                | Yes                              | $2.76 \times 10^8$           | $2.31 \times 10^8$          |
| AGFAGDDAPRAVFPSIVGRPR   | No                | Yes                              | $4.39 \times 10^5$           | $1.99 \times 10^5$          |
| AVFPSIVGRPR             | Yes               | Yes                              | $5.35 \times 10^8$           | $2.65 \times 10^8$          |
| EIVRDIKEK               | Yes               | Yes                              | 0                            | 0                           |
| IWHHTFYNELR             | Yes               | Yes                              | $4.93 \times 10^6$           | $2.27 \times 10^6$          |
| LCYVALDFEQEMATAASSSSLEK | No                | Yes                              | $1.34 \times 10^7$           | $1.48 \times 10^7$          |
| QEYDESGPSIVHR           | Yes               | Yes                              | $7.39 \times 10^7$           | $1.09 \times 10^8$          |
| QEYDESGPSIVHRK          | Yes               | Yes                              | $1.55 \times 10^6$           | $3.28 \times 10^6$          |
| RGILTLK                 | No                | Yes                              | $5.83 \times 10^6$           | $7.63 \times 10^6$          |
| SYELPDGQVITIGNER        | Yes               | Yes                              | $3.77 \times 10^8$           | $2.85 \times 10^8$          |
| SYELPDGQVITIGNERFR      | Yes               | Yes                              | 0                            | 0                           |
| VAPEEHPILLTEAPLNPK      | Yes               | No                               | $3.74 \times 10^7$           | $4.58 \times 10^6$          |
| VAPEEHPILLTEAPLNPKANR   | Yes               | No                               | $1.24 \times 10^8$           | $1.47 \times 10^7$          |
